# Supplementary material for: Beyond Dispersal Limitation: Drivers of Fine-Scale Population Structure in Two Common Solitary Wild Bees
Source: Research Square preprint supplement (doi:10.21203/rs.3.rs-6445279/v1), 2025-06-06
Supplement: Supplementary file 1 [file 3146978c152c7de34d9e87f9.xlsx]

## Sheet: Andrena_haemorrhoa_Allele_Sizes
Appendix S2
Beyond Dispersal Limitation: Drivers of Fine-Scale Population Structure in Two Common Solitary Wild Bees
Maxi Tomowski, Tiemo von Steimker, Valentine Mewis, Anja Ernst, Sissi Lozada-Gobilard, Jasmin Joshi, Florian Jeltsch, Ralph Tiedemann
Table S1: Allele sizes at nine microsatellite loci in 214 Andrena haemorrhoa individuals analyzed in this study
Individual	Kettle-hole_ID	vaga27.1	vaga27.2	AJ25.1	AJ25.2	vaga01.1	vaga01.2	AJ26.1	AJ26.2	vaga03.1	vaga03.2	vaga26.1	vaga26.2	vaga20.1	vaga20.2	AJ01.1	AJ01.2	vaga06.1	vaga06.2
5	28	84	84	110	112	171	177	0	0	113	129	150	150	169	171	87	87	224	224
6	28	84	80	112	112	171	173	155	157	0	0	150	152	185	187	87	85	198	214
7	28	84	84	110	108	171	163	157	157	121	135	150	152	169	189	85	85	200	222
21	40	84	84	110	114	165	167	155	157	127	141	152	138	185	177	85	85	198	194
24	40	84	84	110	108	171	173	157	157	135	119	152	142	175	195	87	85	198	202
25	40	84	92	110	110	177	183	157	149	131	131	150	140	185	177	85	89	200	206
26	40	88	88	110	110	171	171	157	157	127	143	154	154	177	173	85	85	194	220
27	40	84	80	112	112	167	167	157	157	125	125	150	150	175	175	85	85	204	212
61	1598	84	84	110	112	163	181	155	157	131	125	150	138	183	183	85	85	202	226
62	1598	84	80	110	110	181	169	157	153	133	139	150	138	185	177	85	85	200	212
63	1598	84	100	112	112	167	187	157	153	127	145	150	152	187	191	87	85	198	210
65	1598	84	84	110	110	171	183	157	157	143	145	150	150	185	177	87	87	206	206
68	1598	92	82	112	112	171	183	157	157	113	125	150	138	171	171	85	85	198	202
69	1598	84	76	112	112	171	165	155	159	131	143	150	152	175	175	85	85	194	202
71	1598	84	86	110	112	171	163	157	153	139	137	152	154	185	189	87	87	224	212
80	1598	88	88	108	108	183	183	157	157	123	123	150	150	171	177	85	85	206	206
85	1598	78	78	110	110	177	179	159	159	137	137	150	152	175	175	87	87	198	206
88	1598	92	92	110	110	171	191	153	153	119	123	150	150	187	177	85	85	200	200
106	1604	80	86	110	112	171	177	157	157	131	143	150	138	183	179	85	85	200	202
107	1604	84	80	110	110	177	165	155	153	121	127	150	150	187	177	85	85	202	202
108	1604	84	106	110	110	171	165	157	153	121	145	150	152	185	185	85	85	202	204
114	2565	80	76	110	110	171	167	155	157	121	131	150	150	185	181	87	85	194	202
115	2565	84	84	110	110	171	167	157	159	127	125	152	138	169	169	87	87	198	200
117	2565	84	84	110	112	177	173	157	153	135	143	150	138	171	191	87	85	202	206
128	1590	84	84	112	108	167	167	155	157	133	123	150	138	177	179	85	85	198	202
136	1599	84	80	112	112	175	185	157	157	121	125	150	150	191	191	87	87	198	202
137	1599	84	84	110	110	165	167	149	153	135	127	150	150	189	193	87	85	194	226
138	1590	84	84	110	112	177	173	157	157	125	137	150	152	177	177	85	85	200	202
141	1599	84	82	110	110	183	169	157	157	129	137	150	154	161	199	85	85	198	206
143	1599	84	84	110	110	171	171	157	157	121	121	150	152	187	177	87	87	202	202
145	1599	80	80	110	110	167	175	157	153	129	121	150	138	189	177	85	85	224	194
238	1599	84	92	110	108	171	175	157	153	127	119	150	150	185	177	85	85	200	206
262	892	80	82	110	112	163	185	157	157	129	127	150	152	175	175	87	85	200	204
265	892	92	100	110	114	171	171	157	157	151	151	152	152	187	187	85	85	202	206
266	892	84	84	110	110	181	181	155	155	121	123	150	152	187	177	87	87	206	206
267	910	84	76	110	112	165	167	157	153	129	143	138	154	177	161	87	85	198	202
275	910	84	82	112	112	183	183	157	153	127	131	150	138	177	197	87	85	202	204
277	910	84	76	110	110	173	187	157	149	121	123	138	142	189	193	85	85	224	198
278	910	84	84	110	112	171	169	155	157	145	147	152	154	187	187	87	85	202	206
310	911	84	76	110	110	177	169	157	159	113	135	150	152	175	175	85	85	198	210
360	892	80	76	110	112	179	179	157	157	135	135	150	138	197	197	85	85	198	198
361	892	84	82	110	110	163	167	155	157	119	119	152	152	177	177	87	85	194	202
362	892	84	84	110	112	165	183	157	153	119	119	152	138	169	171	85	85	206	228
363	892	84	80	110	112	173	167	157	157	121	151	152	138	169	171	85	85	198	226
365	907	84	84	110	112	171	179	157	159	131	123	150	138	177	177	85	85	206	204
366	910	80	76	112	108	171	167	157	157	127	137	150	152	185	177	85	85	198	200
368	910	76	76	110	110	181	187	157	157	113	121	150	138	185	191	85	85	202	202
369	910	84	76	114	114	177	177	157	153	131	125	152	138	185	185	85	85	194	202
375	893	84	76	110	110	165	165	155	157	113	121	150	138	175	175	87	85	200	202
385	183	80	80	110	110	165	167	157	153	129	121	152	154	177	177	85	85	198	198
386	183	84	86	110	112	165	167	157	157	129	121	150	138	189	177	87	85	198	200
387	183	84	86	112	112	171	163	155	157	125	133	150	152	177	177	87	85	224	206
389	183	84	84	110	110	171	177	159	159	131	125	150	150	181	181	85	85	194	202
390	183	84	80	110	110	177	165	155	157	129	129	150	150	177	181	87	85	202	204
391	187	80	78	110	110	171	183	157	157	125	133	150	142	177	177	85	85	200	202
392	187	84	86	108	108	171	181	157	159	121	131	150	136	177	173	85	85	202	206
393	187	84	98	112	112	171	177	155	157	131	125	152	138	177	173	85	85	202	206
394	187	84	84	110	112	171	167	157	157	123	123	152	138	177	177	87	85	202	202
395	187	86	86	118	118	171	181	157	157	125	133	150	150	173	173	85	85	202	206
396	187	84	100	110	112	171	175	157	159	0	0	150	154	195	183	85	85	202	206
398	187	84	90	112	108	171	167	157	153	125	145	152	152	177	165	85	85	198	194
399	187	92	76	110	110	171	181	149	153	139	123	150	138	177	173	85	85	198	202
401	187	80	80	110	110	173	185	155	157	121	125	150	150	177	179	85	85	202	210
402	187	84	84	110	112	177	183	153	153	121	143	152	152	185	193	85	85	200	208
408	187	80	86	110	112	171	167	157	145	125	125	150	150	169	171	87	85	198	194
409	187	84	84	112	108	163	163	157	157	129	129	150	152	171	181	87	85	224	198
410	187	84	84	112	108	177	165	155	157	149	149	150	152	171	177	85	85	194	226
425	190	84	78	112	112	171	171	157	157	121	125	150	150	177	193	87	85	194	206
429	190	84	102	110	110	179	179	157	159	139	139	152	140	177	179	85	85	202	202
430	190	92	88	110	112	163	175	157	153	113	121	150	152	171	175	85	85	200	194
432	187	84	80	112	108	171	171	155	157	131	131	152	152	187	177	87	85	194	202
433	187	84	84	112	112	177	173	155	155	139	151	150	152	171	171	85	85	206	226
434	187	84	84	110	112	173	187	157	157	135	131	150	142	185	161	87	85	200	206
435	187	76	78	110	112	177	175	157	149	125	151	150	152	185	189	87	85	194	206
436	187	84	84	112	108	163	169	157	157	129	123	150	152	171	177	85	85	198	226
437	187	84	76	110	112	171	169	155	159	129	131	150	152	167	167	85	85	202	208
440	187	84	80	110	112	169	169	157	159	129	141	150	152	169	177	87	85	202	206
441	190	84	84	110	114	173	181	157	153	125	133	150	152	169	177	85	85	198	200
442	190	80	86	110	110	171	173	157	149	113	121	150	152	175	191	85	85	202	206
468	190	84	76	110	110	173	185	155	157	129	123	150	150	193	193	85	85	198	200
475	190	76	86	110	110	167	175	157	157	125	125	150	152	175	175	87	85	202	208
476	183	84	78	110	110	171	163	155	155	113	121	142	154	177	177	85	85	202	226
479	183	84	82	112	112	165	167	157	153	0	0	138	154	177	181	87	85	202	204
487	190	84	84	112	112	163	187	155	157	135	127	150	142	185	175	85	85	202	212
490	190	84	80	110	110	167	167	155	165	143	143	150	152	185	175	87	85	200	194
491	183	84	84	110	112	163	179	157	153	121	135	150	142	177	177	87	87	222	206
502	183	84	76	110	110	183	181	155	153	125	139	150	150	187	175	85	85	198	194
503	183	76	78	110	112	177	177	157	153	135	125	152	138	175	175	85	85	198	202
504	807	82	76	110	110	171	181	157	157	133	123	150	150	177	183	85	89	198	204
505	807	84	82	110	110	175	175	153	153	127	119	152	152	177	177	87	87	202	206
544	805	84	84	110	110	171	181	157	157	127	145	150	150	171	185	85	85	194	202
556	805	84	82	110	110	165	183	155	157	135	145	150	152	171	161	85	85	200	204
558	805	84	76	110	112	167	179	157	149	121	137	150	150	187	181	85	85	198	206
564	805	84	76	112	112	183	179	155	155	121	127	152	152	185	191	85	85	194	202
567	805	76	104	110	110	165	165	155	157	145	123	150	150	185	177	85	85	198	202
568	805	84	80	112	108	171	169	153	153	113	139	150	152	177	193	87	85	202	208
569	805	84	82	112	108	171	169	157	157	121	139	150	152	169	183	87	85	202	204
577	805	80	86	112	108	171	165	157	153	113	129	152	154	187	161	87	85	202	206
578	807	76	108	110	110	163	167	155	155	113	135	150	152	169	177	85	85	202	202
587	807	84	84	104	104	165	185	155	159	131	125	150	138	171	189	85	85	198	202
592	807	84	84	112	108	171	187	157	159	121	123	150	150	177	183	85	85	194	194
593	805	84	88	112	108	165	167	157	157	121	139	150	152	171	177	85	85	202	206
596	805	84	84	110	110	165	167	157	161	131	143	152	138	171	175	87	87	194	194
597	805	84	76	110	110	171	173	149	159	0	0	150	152	171	183	85	85	198	204
598	805	84	76	110	110	173	167	149	149	127	133	152	152	185	177	85	85	200	202
599	808	84	84	110	110	171	165	157	153	121	145	150	138	177	177	87	85	198	202
600	805	84	76	110	110	177	177	155	155	131	131	150	150	169	171	85	85	198	202
601	805	84	84	110	112	163	165	155	153	135	123	150	150	187	181	87	87	198	202
700	805	84	82	112	108	173	163	159	159	131	143	150	152	171	171	85	85	206	228
706	805	84	80	110	112	163	165	157	153	135	123	152	152	177	193	87	85	202	220
717	807	84	102	110	112	171	171	155	155	113	113	150	152	181	167	85	85	200	204
719	805	84	76	110	110	169	175	149	149	113	123	156	156	177	177	87	85	208	208
722	807	84	84	112	108	171	185	157	157	121	137	150	154	177	177	85	85	198	210
723	808	84	84	110	108	165	185	155	155	121	143	150	152	175	183	87	85	202	202
724	805	84	80	110	112	173	173	157	157	127	127	150	152	171	191	85	85	200	202
725	808	84	86	112	112	171	169	157	157	127	131	150	150	191	191	85	85	224	224
726	807	84	76	110	110	177	165	157	153	127	131	150	150	177	175	85	85	194	202
729	807	84	88	110	110	171	173	159	159	125	133	152	138	189	177	85	85	198	210
754	807	84	86	110	110	167	167	155	157	129	133	150	152	185	177	85	85	202	202
755	807	84	96	110	108	171	167	153	153	129	135	152	152	171	177	85	89	202	202
812	807	84	92	112	112	165	183	157	149	0	0	150	150	175	181	87	85	202	206
822	808	84	80	110	108	171	163	157	159	131	123	150	138	175	181	85	85	214	204
840	808	84	78	110	112	165	181	155	157	137	123	152	152	177	197	87	85	214	202
846	808	84	84	110	112	183	185	157	165	121	121	150	152	175	175	87	87	198	202
848	808	82	102	110	110	171	171	157	157	135	125	138	138	185	175	85	85	194	212
853	808	84	86	110	110	165	179	157	153	123	147	150	152	177	177	87	85	198	200
859	808	84	80	112	112	171	171	155	157	121	121	152	152	169	183	85	85	224	202
862	1229	84	84	110	110	177	167	157	153	129	129	150	150	175	181	87	85	202	204
876	1229	84	84	112	112	173	169	155	149	121	139	152	152	175	175	87	85	198	208
900	1229	84	84	110	110	177	183	155	155	141	125	150	152	177	177	85	85	200	210
901	1228	84	76	110	112	177	163	157	157	129	129	150	152	173	183	85	85	200	206
902	1228	84	88	110	112	171	165	157	153	151	151	150	138	183	179	85	85	198	202
904	1228	84	82	110	120	183	161	157	153	121	131	152	152	177	197	85	85	202	206
908	1228	92	86	110	110	171	177	153	159	0	0	150	154	175	191	85	85	198	194
909	1228	84	84	110	108	165	169	157	157	113	131	150	150	171	189	87	85	202	202
910	1228	84	82	110	110	173	165	157	165	125	139	150	152	185	173	87	85	202	212
911	1229	78	78	110	110	167	179	157	157	121	121	150	138	175	193	85	85	198	206
938	1228	84	104	110	110	171	173	157	153	113	125	150	150	191	181	85	85	206	228
940	607	76	76	110	110	171	173	155	155	131	137	150	152	187	175	85	85	214	200
1030	1189	84	102	110	110	171	163	157	157	135	147	150	150	177	177	85	85	198	194
1032	1189	84	84	110	110	171	167	157	157	141	125	150	150	175	173	85	85	200	202
1034	2484	84	76	108	108	177	177	157	157	121	125	152	152	167	167	85	85	202	204
1035	2484	80	92	110	110	163	183	155	157	121	133	136	136	177	173	85	85	202	206
1036	606	84	84	110	110	177	167	157	157	0	0	150	142	169	197	87	85	194	204
1037	606	84	76	110	110	171	183	157	153	0	0	152	138	187	191	85	85	202	204
1038	1189	84	84	110	112	171	183	155	155	121	133	150	154	179	193	87	85	200	228
1039	1189	84	92	110	110	167	161	149	149	121	131	150	152	171	197	87	85	202	202
1040	606	84	86	110	112	165	167	157	157	121	135	150	150	177	181	87	85	194	202
1041	258	80	80	110	110	177	165	153	159	135	137	152	138	177	177	85	85	198	200
1042	312	84	88	110	110	167	183	153	159	129	121	150	138	187	189	85	85	198	200
1043	258	84	80	110	112	173	183	157	153	121	125	150	150	169	177	85	85	194	202
1044	258	80	80	110	112	167	183	155	157	121	141	150	152	171	177	85	85	198	194
1045	287	84	82	110	110	171	163	155	157	121	133	150	154	169	171	85	85	222	202
1046	312	82	86	110	110	167	167	159	161	131	137	152	152	177	183	87	85	202	202
1047	265	84	76	112	114	171	179	157	157	133	133	150	138	169	177	87	85	198	200
1048	259	86	102	110	112	171	169	155	157	129	135	138	136	177	191	87	85	200	202
1049	312	84	84	110	110	167	183	157	157	121	141	152	152	177	161	85	85	194	202
1078	287	84	84	110	110	171	167	155	155	131	125	150	138	177	177	87	85	198	202
1079	259	84	84	112	112	167	169	157	157	145	123	150	136	177	177	85	85	202	212
1081	259	84	80	110	112	177	167	157	157	121	131	150	150	185	183	87	85	198	202
1083	312	84	86	110	112	171	173	153	153	135	131	150	152	187	177	87	85	200	204
1085	259	84	76	110	110	171	183	155	155	129	153	152	138	175	175	87	85	202	206
1089	312	92	82	110	112	173	163	157	157	129	121	150	138	189	173	87	85	198	198
1090	312	84	86	110	110	171	173	149	153	149	149	152	138	171	179	87	85	206	206
1104	265	84	84	110	110	171	163	157	159	131	137	150	138	177	175	85	85	202	206
1105	312	84	84	112	112	167	179	157	159	133	123	150	152	187	177	85	85	198	200
1106	259	84	80	112	114	167	175	155	157	129	141	150	152	187	173	85	85	202	208
1107	259	84	84	110	110	165	183	157	157	121	133	150	152	177	161	85	85	200	202
1109	259	102	104	110	110	171	171	155	157	121	143	152	138	185	183	87	85	200	194
1112	259	84	80	112	108	175	175	153	159	145	145	150	150	171	183	85	85	198	202
1114	275	76	76	110	108	171	167	149	149	143	143	150	138	185	197	85	85	200	206
1117	275	84	84	110	110	163	165	157	153	113	113	150	138	187	175	85	85	198	206
1119	275	100	104	110	112	165	167	155	155	129	121	150	150	183	183	87	85	194	202
1132	258	84	84	110	110	171	167	155	153	135	135	150	152	177	177	85	85	194	212
1137	265	84	76	110	112	167	183	157	157	143	133	150	152	177	179	87	85	202	202
1138	265	84	76	110	110	167	179	155	157	121	125	150	152	189	181	87	87	214	194
1139	265	80	88	110	112	167	167	157	153	139	139	150	150	169	173	87	87	198	226
1186	258	76	76	110	110	187	175	157	157	131	123	150	150	175	175	85	85	200	212
1193	265	84	88	112	108	171	171	155	157	121	131	150	152	171	189	87	85	198	206
1194	269	80	76	110	112	163	167	157	157	133	137	152	138	177	167	87	85	222	202
1216	269	84	80	110	110	171	167	155	157	121	131	150	152	177	173	87	87	198	194
1220	269	84	76	110	112	171	165	155	157	133	139	150	152	177	181	87	85	200	202
1225	275	84	84	110	110	173	179	157	159	121	131	150	150	177	193	87	87	194	204
1226	265	76	76	112	112	167	179	155	155	131	111	150	152	177	177	87	85	202	228
1227	265	84	84	110	110	183	179	157	157	121	141	152	152	177	191	87	85	198	202
1228	265	84	96	110	110	171	171	157	153	133	137	150	152	177	177	85	85	202	202
1230	265	76	76	112	112	167	179	155	155	113	133	150	152	187	177	87	85	228	208
1232	275	84	80	110	110	167	167	155	157	113	121	150	142	185	177	87	85	200	202
1233	275	80	102	112	112	165	165	157	157	127	123	150	138	171	181	85	85	202	206
1238	275	80	82	110	110	171	183	153	153	133	139	150	138	175	175	87	87	198	206
1241	275	92	86	110	112	171	181	155	157	123	123	150	150	197	197	85	85	198	208
1242	258	84	84	112	112	171	161	157	157	129	131	150	152	177	177	87	85	198	204
1244	259	84	80	112	112	173	173	155	165	121	121	150	150	187	193	85	85	194	196
1262	265	76	78	112	112	171	167	157	153	0	0	150	152	171	177	85	85	202	206
1265	265	84	84	110	110	165	175	157	165	121	121	152	138	177	177	85	85	202	206
1267	265	80	80	112	108	171	165	155	157	135	137	150	152	177	175	85	85	200	194
1326	235	84	76	110	112	177	165	157	157	121	145	150	138	181	181	87	85	202	202
1327	235	84	84	110	110	171	165	155	157	129	133	150	152	177	179	87	85	202	206
1328	236	84	80	110	112	177	161	155	157	121	131	152	152	177	177	87	85	194	206
1329	236	80	80	110	110	177	169	155	153	127	131	150	152	177	183	85	85	198	202
1330	235	80	92	110	110	167	175	155	155	129	133	152	138	187	177	85	85	198	204
1331	235	84	84	110	110	171	165	157	153	125	125	150	152	169	177	85	85	206	206
1332	235	84	80	110	110	171	183	155	153	121	121	150	154	177	177	87	85	202	206
1333	235	82	76	112	108	171	171	157	157	113	113	150	150	185	175	87	85	198	202
1366	235	84	100	110	110	171	163	0	0	131	117	152	152	181	193	87	85	222	206
1367	235	84	100	110	110	163	165	157	153	125	125	150	154	171	177	87	85	200	210
1368	149	84	78	110	110	167	183	155	165	135	137	152	152	175	197	87	85	194	204
1369	149	84	98	112	108	171	167	157	161	121	127	150	150	177	177	85	85	202	208
1370	149	84	76	110	112	171	183	157	157	119	131	150	150	171	173	87	87	224	202
1371	149	76	76	110	112	171	171	153	153	125	125	138	138	169	199	85	85	202	206
1372	149	80	82	110	110	171	167	155	157	121	123	152	154	177	177	87	85	194	206
1373	149	84	82	110	110	171	181	157	149	121	127	150	154	169	179	85	85	198	202
1374	149	84	76	110	112	177	165	157	161	119	123	138	138	177	177	85	85	202	202
1375	149	92	76	110	112	171	177	157	157	139	139	150	150	195	191	85	89	198	198

## Sheet: Andrena_nigroaenea_Allele_Sizes
Appendix S2
Beyond Dispersal Limitation: Drivers of Fine-Scale Population Structure in Two Common Solitary Wild Bees
Maxi Tomowski, Tiemo von Steimker, Valentine Mewis, Anja Ernst, Sissi Lozada-Gobilard, Jasmin Joshi, Florian Jeltsch, Ralph Tiedemann
Table S2: Allele sizes at nine microsatellite loci in 137 Andrena nigroaenea individuals analyzed in this study
Individual	Kettle-hole-ID	vaga27.1	vaga27.2	vaga21.1	vaga21.2	AJ01.1	AJ01.2	vaga13.1	vaga13.2	vaga08.1	vaga08.2	vaga25.1	vaga25.2	vaga05.1	vaga05.2	AJ25.1	AJ25.2	vaga06.1	vaga06.2
12	40	104	104	123	123	97	103	157	161	127	127	109	113	319	319	138	140	224	232
13	40	104	98	125	125	101	101	133	133	127	129	113	113	319	303	140	134	224	226
14	40	104	104	123	125	101	99	157	133	127	125	113	113	317	323	118	136	224	212
15	40	104	104	125	125	101	101	133	159	125	125	113	113	297	325	118	112	222	222
16	40	104	106	123	123	103	101	161	133	127	127	109	113	311	311	118	120	222	222
19	40	98	106	125	125	97	101	161	159	129	131	109	113	297	313	118	118	0	0
23	40	104	106	123	125	103	101	157	133	127	125	109	109	303	323	138	138	224	222
46	1598	104	104	123	123	101	101	157	157	127	127	113	113	301	301	118	118	212	212
48	1598	104	104	125	125	101	101	161	133	129	131	109	111	305	321	118	118	222	210
50	1598	98	98	123	125	103	105	133	133	129	125	113	113	317	305	120	120	224	234
51	1598	104	104	123	129	101	105	157	165	127	125	109	113	303	317	136	122	224	234
52	1598	104	104	123	123	101	101	157	161	127	121	113	113	301	321	136	120	222	234
54	1598	104	110	123	123	101	101	161	133	127	125	113	107	303	323	134	136	234	234
55	1598	106	106	123	125	101	101	161	133	131	131	109	113	297	325	118	118	214	230
58	1598	104	106	125	131	101	99	161	133	127	129	113	107	317	297	118	116	226	222
66	1598	104	98	125	125	103	101	133	133	131	121	113	107	297	305	118	118	234	240
67	1598	104	104	123	123	103	105	133	133	129	121	109	113	297	301	134	118	224	212
83	1598	104	106	123	123	101	101	157	157	131	131	109	109	303	303	134	118	224	212
89	1598	104	106	123	123	101	99	157	157	129	131	113	113	301	301	116	116	224	224
104	1604	104	106	123	125	103	103	157	133	129	129	109	113	311	321	136	122	224	234
260	1599	104	106	123	125	97	105	157	159	127	127	109	109	297	299	118	118	224	228
276	1599	104	106	123	123	103	101	157	133	127	121	113	113	323	321	116	116	226	222
305	1599	104	106	123	123	101	101	157	133	127	125	109	113	317	317	136	116	222	222
306	1599	104	98	123	123	101	101	157	157	125	131	113	107	313	301	118	118	234	228
309	1599	104	104	125	125	103	105	161	159	129	131	113	113	305	321	118	118	222	222
370	1599	106	106	125	125	101	101	133	133	127	125	113	113	317	321	138	130	234	234
426	1590	104	98	123	125	103	103	157	133	129	131	113	107	297	321	118	118	222	222
428	1599	104	98	123	125	103	103	157	155	127	129	109	113	323	321	140	116	232	226
469	1599	98	98	123	123	101	101	161	133	127	129	113	113	323	321	138	126	224	232
470	1599	98	98	123	129	101	101	161	161	131	121	109	113	303	301	120	120	224	212
478	190	104	104	125	125	103	103	133	133	127	121	109	107	0	0	118	136	224	220
480	911	104	98	123	125	101	101	157	157	127	129	109	109	321	299	118	108	226	222
481	911	104	98	123	123	103	111	157	133	127	125	113	113	317	297	118	136	212	234
543	910	98	106	123	123	101	101	157	161	125	131	113	113	303	317	118	120	224	234
545	910	104	110	123	123	101	105	157	133	127	129	109	113	297	321	122	142	234	220
547	911	104	104	123	123	101	101	157	157	127	127	109	113	297	297	116	116	224	224
549	187	104	98	125	125	101	101	161	133	127	131	109	109	301	321	118	118	234	238
565	258	104	98	123	123	101	107	161	159	127	121	113	113	319	301	118	126	222	244
573	258	104	104	123	123	103	101	157	133	127	129	113	113	297	297	136	136	222	234
809	807	104	104	123	123	103	101	161	133	127	131	109	113	321	321	118	118	226	234
831	807	104	98	125	125	101	101	133	133	127	129	113	113	319	297	118	118	234	236
833	187	98	98	123	123	101	101	161	159	127	129	109	113	301	321	118	116	222	222
842	187	104	104	125	129	101	101	133	165	129	129	109	109	319	325	134	116	224	244
844	187	98	90	123	123	101	105	161	133	127	127	113	113	325	311	118	136	224	236
845	187	104	104	123	125	97	101	157	159	127	127	113	113	297	325	138	138	226	212
852	187	104	106	123	125	103	101	157	133	129	125	113	113	321	327	118	136	224	232
854	187	104	104	125	125	101	101	133	133	125	125	113	113	319	301	118	136	224	224
855	187	104	104	123	123	97	101	133	133	127	125	109	109	297	321	118	118	224	212
857	187	104	106	123	129	97	101	157	133	127	129	109	113	319	305	116	116	224	238
881	908	98	106	123	125	105	105	133	133	129	131	107	107	301	301	118	116	224	224
882	908	104	106	127	127	101	111	161	133	127	127	109	113	301	309	122	116	224	226
883	908	104	104	123	125	103	103	157	161	127	131	113	113	317	301	138	118	224	224
884	908	104	106	123	125	97	101	161	133	129	131	109	113	303	297	118	118	224	224
885	908	104	104	125	129	103	101	133	133	127	129	113	113	297	305	140	116	226	234
886	908	98	106	125	125	103	101	133	133	127	127	113	113	311	313	138	138	234	234
888	908	104	104	123	125	97	101	157	159	125	125	113	113	321	321	118	116	212	212
889	908	104	106	123	123	97	103	157	133	127	125	113	113	317	325	140	116	224	212
890	908	104	104	125	125	103	103	161	133	121	121	107	107	323	297	140	118	226	226
891	908	104	104	125	125	101	101	157	157	127	131	113	107	319	319	118	132	224	234
894	149	104	90	123	123	97	103	133	167	127	121	113	111	317	297	138	118	234	214
895	149	98	98	123	123	103	105	157	161	127	131	113	113	309	309	116	124	212	222
897	149	104	104	123	125	103	101	157	133	129	125	109	113	319	297	118	136	212	234
903	149	104	106	125	125	97	103	161	133	129	129	109	113	303	317	120	116	234	238
905	149	104	104	123	125	97	99	133	133	127	121	109	113	0	0	118	118	212	238
983	187	98	106	123	123	101	101	157	159	127	125	109	109	303	305	118	116	224	224
985	187	104	98	123	125	103	107	157	157	127	131	113	113	321	321	118	136	226	234
986	187	104	98	123	125	103	101	157	133	127	125	113	113	319	303	118	122	212	234
993	187	104	106	123	125	103	101	161	159	127	127	109	113	301	299	118	118	212	222
995	187	104	98	123	123	103	101	133	133	127	129	113	113	297	297	118	120	222	234
996	187	106	106	125	125	109	109	161	161	129	129	109	113	297	297	122	116	224	218
997	187	104	106	123	125	103	101	161	133	127	129	109	113	317	323	138	140	224	224
998	312	104	98	123	125	103	101	161	133	127	125	109	113	321	321	136	136	224	234
999	312	98	84	125	125	105	105	161	155	127	127	113	113	317	317	118	136	224	222
1001	319	104	98	123	123	101	101	133	133	127	127	113	113	303	301	118	142	222	222
1002	319	104	106	123	123	101	101	133	133	131	131	109	109	323	297	118	118	224	224
1003	265	98	106	123	123	101	111	157	133	127	131	109	113	311	305	118	118	0	0
1004	265	106	106	123	123	101	105	155	155	127	129	113	113	301	301	116	116	234	234
1005	187	104	106	125	125	97	101	133	133	127	131	109	113	301	321	118	126	0	0
1006	187	104	98	123	125	103	101	157	159	125	131	109	109	303	321	126	126	224	226
1014	187	104	104	123	123	101	99	157	161	127	131	113	107	0	0	138	118	0	0
1015	187	104	104	123	125	103	103	133	133	127	127	109	113	297	311	118	122	224	234
1016	319	104	106	123	123	101	101	133	133	125	125	109	113	297	313	118	136	222	222
1017	808	104	84	123	123	101	101	157	157	131	131	109	113	325	327	138	116	226	234
1019	808	104	104	123	125	103	103	133	133	129	131	113	107	317	323	118	118	222	234
1074	808	104	104	125	125	97	103	157	133	121	121	113	113	317	323	116	126	224	222
1077	265	98	106	123	123	101	101	157	157	131	121	113	113	323	327	118	136	234	228
1094	265	104	84	125	125	103	99	157	133	129	121	109	111	317	301	116	116	222	222
1095	265	106	106	125	125	101	101	161	133	127	131	113	107	303	301	118	118	234	220
1096	319	104	84	123	123	101	101	159	127	127	131	109	109	319	309	140	118	224	224
1097	319	84	102	125	125	105	105	133	133	129	125	109	109	319	317	118	136	224	224
1098	319	98	84	125	125	101	101	157	161	131	131	109	109	301	305	120	108	226	226
1099	319	104	84	123	125	103	103	133	155	127	129	113	113	0	0	116	130	212	234
1101	319	104	84	123	125	103	101	133	133	129	129	113	111	323	321	118	118	224	240
1102	319	104	84	123	125	101	101	159	131	125	125	109	113	323	321	136	130	232	226
1103	265	104	84	123	123	105	105	133	133	129	125	113	113	319	321	118	118	214	214
1115	265	106	106	125	125	101	101	157	159	127	127	111	111	297	305	138	138	222	222
1116	265	104	106	123	125	101	101	157	133	129	131	113	111	319	303	140	124	234	218
1124	265	104	104	123	123	103	105	133	159	129	131	109	113	317	321	134	118	224	234
1135	265	104	104	123	125	101	101	157	133	129	121	109	109	323	321	118	116	224	218
1152	265	98	106	123	125	97	105	161	165	127	129	113	107	305	327	138	136	222	242
1153	265	104	90	123	123	101	101	161	159	129	131	109	113	317	297	120	116	224	234
1154	265	104	104	125	125	103	101	161	133	127	131	109	113	323	321	118	118	212	214
1156	265	104	104	123	125	97	97	133	159	129	131	109	113	323	309	118	120	212	234
1159	269	104	104	123	125	103	103	161	133	129	129	113	107	297	305	118	118	234	242
1161	275	104	104	123	125	101	101	133	133	121	121	109	113	297	321	140	118	224	234
1162	265	104	98	123	123	101	101	157	161	127	131	109	113	297	297	134	136	226	228
1163	183	106	106	123	123	101	101	157	155	131	131	109	109	297	321	118	136	240	240
1164	269	104	98	123	125	97	101	157	133	127	125	113	113	305	305	118	118	222	234
1165	183	98	98	125	127	101	101	133	133	129	121	107	107	297	297	126	142	218	218
1166	269	104	104	123	123	103	103	155	155	127	131	109	113	297	297	136	116	224	240
1167	265	104	104	123	123	103	103	157	161	125	131	113	113	297	321	118	116	224	234
1180	607	104	98	123	123	103	101	157	133	131	121	109	113	319	297	118	136	222	244
1182	607	104	98	123	125	101	101	133	133	129	131	109	113	297	321	118	118	224	234
1183	2489	98	98	125	125	103	103	161	161	129	129	109	113	313	299	118	118	224	222
1184	1228	104	106	123	129	101	101	161	161	127	127	113	113	297	297	118	118	224	212
1203	1229	104	106	123	125	101	105	157	157	127	131	113	113	297	321	118	118	224	224
1204	2489	104	104	123	125	97	97	161	155	127	127	113	113	319	321	116	116	224	234
1205	2489	104	104	125	125	101	101	133	133	131	131	109	109	313	313	138	120	220	220
1206	2489	104	98	123	125	97	101	161	133	127	131	109	111	303	297	134	136	224	226
1207	2489	98	98	125	125	103	101	161	161	127	125	113	113	297	329	118	118	222	222
1208	1228	104	106	123	123	103	103	161	161	127	131	109	109	321	321	134	136	212	212
1210	1228	104	106	123	127	97	103	157	133	125	131	109	113	303	311	136	116	234	234
1211	1228	104	106	123	125	103	101	133	133	127	121	109	113	319	305	118	136	222	234
1214	1228	104	98	123	123	103	105	161	161	127	121	109	113	317	297	118	118	224	224
1215	606	104	104	123	123	103	99	133	133	127	131	109	113	303	297	136	116	234	214
1217	606	104	104	125	125	101	101	157	133	127	127	109	113	297	301	140	122	224	224
1219	606	104	104	123	123	101	101	157	133	125	131	113	113	303	303	118	118	234	234
1223	606	104	104	123	125	101	105	133	133	129	125	109	113	301	321	140	136	226	234
1236	607	98	98	125	125	101	101	157	133	131	131	109	111	305	321	118	118	232	226
1245	607	98	106	123	125	97	101	157	133	125	131	113	113	317	297	118	136	224	224
1246	2489	90	90	125	125	103	99	157	157	129	131	113	113	305	309	118	118	226	226
1259	2489	104	106	123	125	103	101	161	133	129	131	107	107	297	301	122	122	234	234
1260	2489	104	104	123	123	103	103	157	133	131	121	109	113	297	325	118	142	224	212
1264	2489	104	104	123	123	101	99	157	157	127	127	113	113	321	299	134	118	224	224
1342	2489	98	98	123	125	103	101	157	157	127	125	109	113	317	321	138	118	224	234
1381	2489	104	104	125	125	101	105	157	161	127	127	113	113	303	313	136	136	232	232
1382	2489	98	106	123	125	103	103	133	133	127	129	109	113	323	297	118	124	224	232
