# Supplementary material for: Beyond Dispersal Limitation: Drivers of Fine-Scale Population Structure in Two Common Solitary Wild Bees
Source: Research Square preprint supplement (doi:10.21203/rs.3.rs-6445279/v1), 2025-06-06
Supplement: Supplementary file 2 [file fb27698bb44708e31167e0bf.docx]

**Appendix S1**

***Beyond Dispersal Limitation: Drivers of Fine-Scale Population Structure in Two Common Solitary Wild Bees***

# Table S1 Overview of sampled *Andrena haemorrhoa* and *Andrena nigroaenea* at kettle-holes grouped by spatial cluster in the *Agroscapelab* research area in northeastern Germany (see Methods), including spatial cluster, kettle-hole ID, coordinates (WGS84), and individual count (n).

| ***Andrena haemorrhoa*** | | | | | ***Andrena nigroaenea*** | | | | |
| --- | --- | --- | --- | --- | --- | --- | --- | --- | --- |
| ***Spatial Cluster*** | ***Ketlle-hole*** | ***x*** | ***y*** | ***n*** | ***Spatial Cluster*** | ***Kettle-hole*** | ***x*** | ***y*** | ***n*** |
| 1 | 149 | 13.758482 | 53.349858 | 8 | 1 | 149 | 13.758482 | 53.349858 | 5 |
| 2 | 190 | 13.727117 | 53.362444 | 9 | 1 | 190 | 13.727117 | 53.362444 | 1 |
| 2 | 187 | 13.742511 | 53.363995 | 20 | 1 | 187 | 13.742511 | 53.363995 | 20 |
| 2 | 183 | 13.742717 | 53.367470 | 10 | 1 | 183 | 13.742717 | 53.367470 | 2 |
| 3 | 235 | 13.721543 | 53.327811 | 8 | 1 | 269 | 13.701001 | 53.376962 | 3 |
| 3 | 236 | 13.721488 | 53.328479 | 2 | 1 | 265 | 13.704492 | 53.378195 | 16 |
| 4 | 269 | 13.701001 | 53.376962 | 3 | 1 | 319 | 13.670430 | 53.378829 | 9 |
| 4 | 265 | 13.704492 | 53.378195 | 13 | 1 | 258 | 13.707032 | 53.382468 | 2 |
| 4 | 258 | 13.707032 | 53.382468 | 6 | 1 | 275 | 13.709487 | 53.385975 | 1 |
| 4 | 259 | 13.706979 | 53.384092 | 9 | 1 | 312 | 13.686318 | 53.386734 | 2 |
| 4 | 287 | 13.699214 | 53.385843 | 2 | 1 | 808 | 13.667568 | 53.396518 | 3 |
| 4 | 275 | 13.709487 | 53.385975 | 8 | 1 | 807 | 13.665798 | 53.397377 | 2 |
| 4 | 312 | 13.686318 | 53.386734 | 7 | 1 | 908 | 13.639553 | 53.405256 | 10 |
| 5 | 805 | 13.662017 | 53.394665 | 18 | 1 | 910 | 13.641936 | 53.407186 | 2 |
| 5 | 808 | 13.667568 | 53.396518 | 9 | 1 | 911 | 13.640171 | 53.408547 | 3 |
| 5 | 807 | 13.665798 | 53.397377 | 12 | 2 | 606 | 13.629944 | 53.347328 | 4 |
| 6 | 907 | 13.638137 | 53.405524 | 1 | 2 | 607 | 13.631487 | 53.347977 | 4 |
| 6 | 892 | 13.651345 | 53.406355 | 7 | 2 | 2489 | 13.623681 | 53.352275 | 12 |
| 6 | 910 | 13.641936 | 53.407186 | 7 | 2 | 1229 | 13.597662 | 53.363931 | 1 |
| 6 | 893 | 13.652892 | 53.408342 | 1 | 2 | 1228 | 13.598962 | 53.364171 | 5 |
| 6 | 911 | 13.640171 | 53.408547 | 1 | 3 | 1590 | 13.541943 | 53.303302 | 1 |
| 7 | 606 | 13.629944 | 53.347328 | 3 | 3 | 1604 | 13.551442 | 53.306172 | 1 |
| 7 | 607 | 13.631487 | 53.347977 | 1 | 3 | 1598 | 13.553018 | 53.308537 | 12 |
| 7 | 2484 | 13.623681 | 53.352275 | 2 | 3 | 1599 | 13.551857 | 53.308914 | 9 |
| 7 | 1189 | 13.618345 | 53.353518 | 4 | 3 | 40 | 13.537215 | 53.317315 | 7 |
| 8 | 1229 | 13.597662 | 53.363931 | 4 |  | | | | |
| 8 | 1228 | 13.598962 | 53.364171 | 7 |
| 9 | 1590 | 13.541943 | 53.303302 | 2 |
| 9 | 1604 | 13.551442 | 53.306172 | 3 |
| 9 | 2565 | 13.558765 | 53.306179 | 3 |
| 9 | 1598 | 13.553018 | 53.308537 | 10 |
| 9 | 1599 | 13.551857 | 53.308914 | 6 |
| 10 | 40 | 13.537215 | 53.317315 | 5 |
| 10 | 28 | 13.528872 | 53.317754 | 3 |

**Table S2** Details of primers used for microsatellite analyses of *Andrena haemorrhoa* and *Andrena nigroaenea* with name, fragment size, core repeat, primer sequence, annealing temperature (mean*ForRev*) and the literature reference. Note: Loci with more than 5 % missing data, high null allele frequency > 0.3 as well as monomorphic loci were excluded from the analysis.

| ***Name*** | ***Fragment Size (bp)*** | ***Core Repeat*** | ***Forward Primer Sequence*** | ***Reverse Primer Sequence*** | ***Tm (°C)*** | ***Ref.*** |
| --- | --- | --- | --- | --- | --- | --- |
| AJ-01 | 99 | GA12 | CTTTTACCC | GAACGAGAG | 60.95 | Paxton et al., 1996 |
| AJ-25 | 149 | CT23 | GATCAAACG | CTTCGTTAC | 56.45 | Paxton et al., 1996 |
| AJ-26 | 147 | CT15 | AGCCCTTCC | GATTCCGTG | 57.4 | Paxton et al., 1996 |
| vaga01 | 186 | CT20 | GTGCCAAGT | GAAACACG | 58.25 | Mohra et al., 2000 |
| vaga03 | 107 | CT17 | GATTCGGGA | CGTTTATAG | 58.35 | Mohra et al., 2000 |
| vaga04 | 228 | CT17 | TTCTACGTT | CTTAGTCCG | 57.3 | Mohra et al., 2000 |
| vaga05 | 318 | CT16 | GGAAGGTTG | TGTCCGAAG | 56.3 | Mohra et al., 2000 |
| vaga06 | 194 | CT15 | GCTTTGGTT | CCACTGAAA | 60.9 | Mohra et al., 2000 |
| vaga08 | 171 | CT29 | GATCCGAAA | CTACGTGAC | 57.55 | Mohra et al., 2000 |
| vaga09 | 117 | CT21 | CCGTTGTAA | GATGGAGGA | 55.65 | Mohra et al., 2000 |
| vaga13 | 153 | CT18 | CTTAGTCCG | GGAACGAAA | 58.15 | Mohra et al., 2000 |
| vaga18 | 135 | CT20 | CGACTTTGC | CGACTTGGA | 57.75 | Mohra et al., 2000 |
| vaga19 | 160 | CT23 | GGGTAACGA | TGTTACGTG | 58.5 | Mohra et al., 2000 |
| vaga20 | 183 | CT17 | GATCTTCTT | CTTCCTTTT | 58.05 | Mohra et al., 2000 |
| vaga21 | 149 | CT19 | CCTTGTTAC | TCGGAAACT | 56.7 | Mohra et al., 2000 |
| vaga23 | 219 | CT33 | CTGTGTGGA | GAAGGGAAC | 58.15 | Mohra et al., 2000 |
| vaga25 | 126 | CT18 | GTCGCTACA | CATGGATTC | 58.25 | Mohra et al., 2000 |
| vaga26 | 166 | CT20 | CGAGGGCAA | TTCACGTAG | 57.45 | Mohra et al., 2000 |
| vaga27 | 100 | CT14 | GACGGACTC | CGAGTTGCC | 58.85 | Mohra et al., 2000 |

| **Reagent** | **Volume [µl]** |
| --- | --- |
| 5x My-Taq buffer | 5.0 |
| Forward-Primer [10µM] | 0.34 - 0.5* |
| Reverse-Primer [10µM] | 0.34 - 0.5* |
| My-Taq | 0.12 |
| HPLC-H2O | 16.88-17.52* |
| DNA | 1 |

**Table S3 a)** Polymerase chain reaction protocol. Volumes marked with an asterisk were adjusted according to the primer volume added.

**Table S3 b)** Multiplex mixes for *Andrena haemorrhoa* with primers, annealing temperature and the primer volume used in (two separate) Polymerase Chain Reactions (PCR).

| **Mix** | **Primer** | **A1 T [°C]** | **Amount of Primer [µl]** | **A2 T [°C]** | **Amount of Primer [µl]** |
| --- | --- | --- | --- | --- | --- |
| **A** | vaga27 | 57 | 0.34 | AJ26 | 52 |
|  | vaga01 | 57 | 0.34 | AJ25 | 52 |

| **Mix** | **Primer** | **B1 T [°C]** | **Amount of Primer [µl]** | **B2 T [°C]** | **Amount of Primer [µl]** |
| --- | --- | --- | --- | --- | --- |
| **B** | vaga03 | 52 | 0.34 | vaga08 | 52 |
|  | vaga23 | 52 | 0.5 | vaga26 | 52 |

| **Mix** | **Primer** | **C1 T [°C]** | **Amount of Primer [µl]** | **C2 T [°C]** | **Amount of Primer [µl]** |
| --- | --- | --- | --- | --- | --- |
| **C** | AJ01 | 57 | 0.34 | vaga19 | 57 |
|  | vaga20 | 57 | 0.34 | vaga06 | 57 |

**Table S3 c)** Multiplex mixes for Andrena nigroaenea with primers, annealing temperature and the primer volume used in (two separate) Polymerase Chain Reactions (PCR).

| **Mix** | **Primer** | **A1 T [°C]** | **Amount of Primer [µl]** | **A2 T [°C]** | **Amount of Primer [µl]** |
| --- | --- | --- | --- | --- | --- |
| **A** | vaga27 | 57 | 0.5 | vaga04 | 57 |
|  | vaga18 | 57 | 0.34 |  |  |

| **Mix** | **Primer** | **B1 T [°C]** | **Amount of Primer [µl]** | **B2 T [°C]** | **Amount of Primer [µl]** |
| --- | --- | --- | --- | --- | --- |
| **B** | AJ26 | 57 | 0.34 | vaga03 | 57 |
|  | AJ01 | 57 | 0.34 | vaga21 | 57 |

| **Mix** | **Primer** | **C1 T [°C]** | **Amount of Primer [µl]** | **C2 T [°C]** | **Amount of Primer [µl]** |
| --- | --- | --- | --- | --- | --- |
| **C** | vaga09 | 57 | 0.34 |  |  |
|  | vaga13 | 57 | 0.34 |  |  |
|  | vaga08 | 57 | 0.25 |  |  |

| **Mix** | **Primer** | **D1 T [°C]** | **Amount of Primer [µl]** | **D2 T [°C]** | **Amount of Primer [µl]** |
| --- | --- | --- | --- | --- | --- |
| **D** | vaga25 | 57 | 0.34 | AJ25 | 52 |
|  | vaga05 | 57 | 0.34 | vaga06 | 52 |


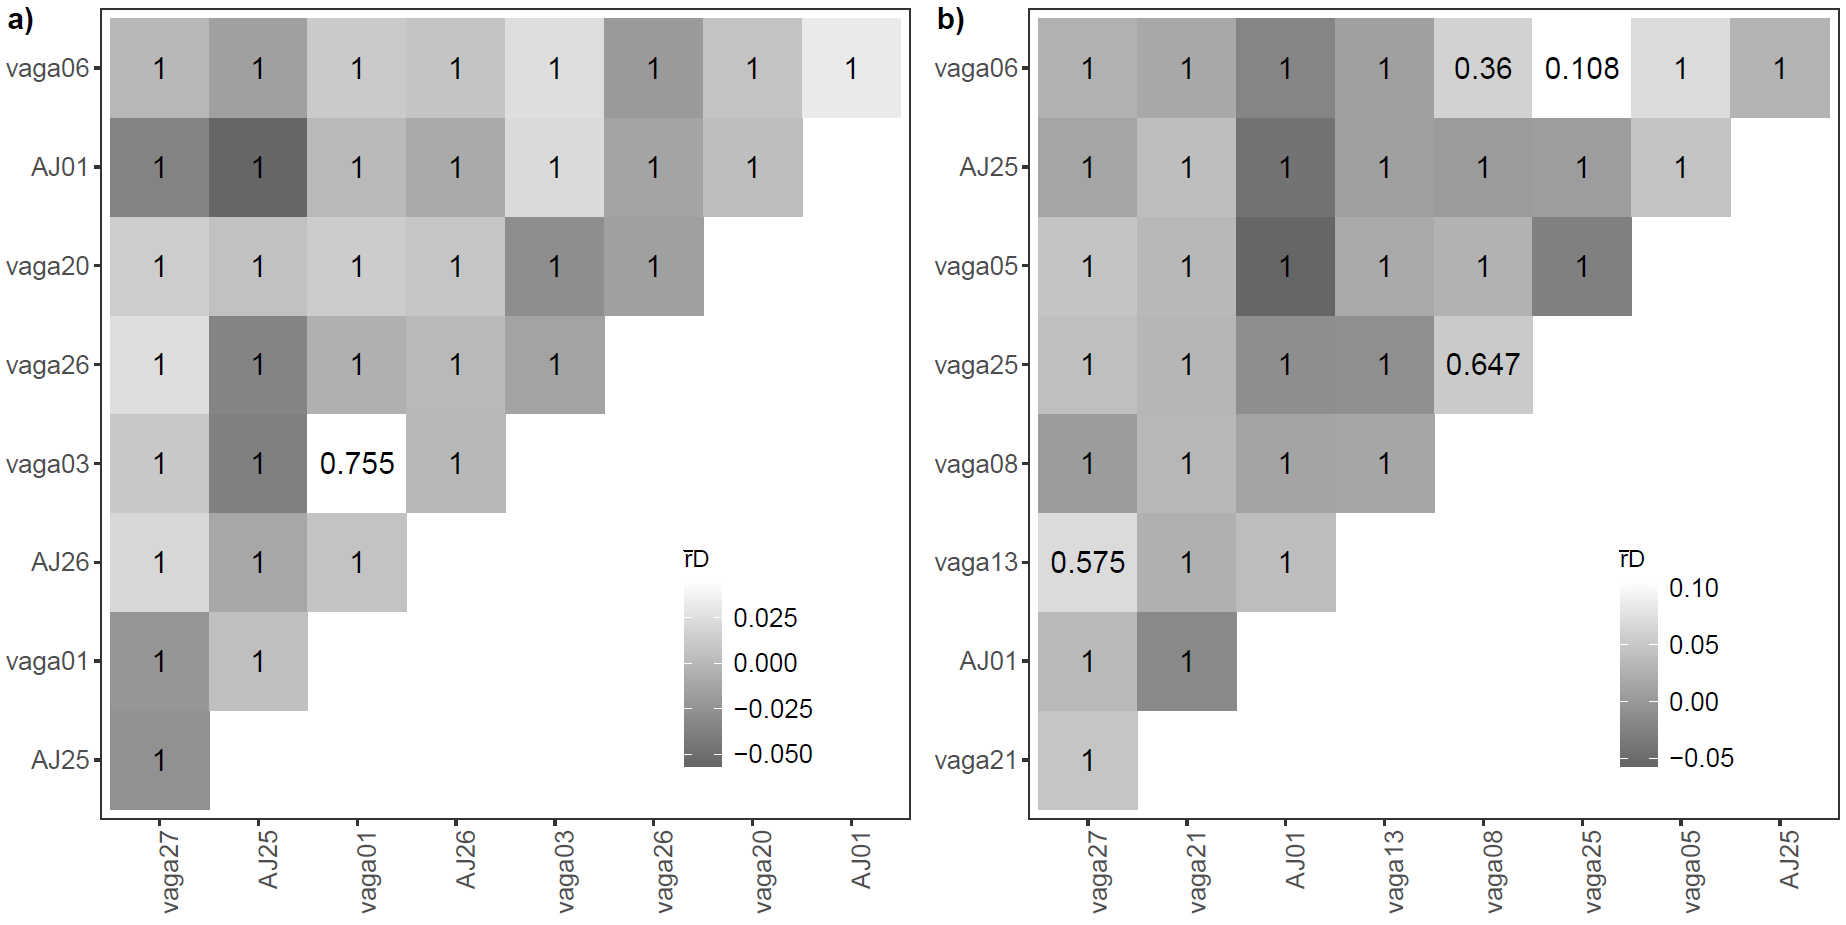


**Figure S1** Heatmaps showing pairwise linkage disequilibrium (LD) for (a) Andrena haemorrhoa and (b) Andrena nigroaenea, measured as r̄D. The shading represents LD strength, with lower values (weaker LD) in darker grey and higher values (stronger LD) in white (grayscale). Numbers in cells indicate significance (p-values), with an alpha threshold of 0.05.


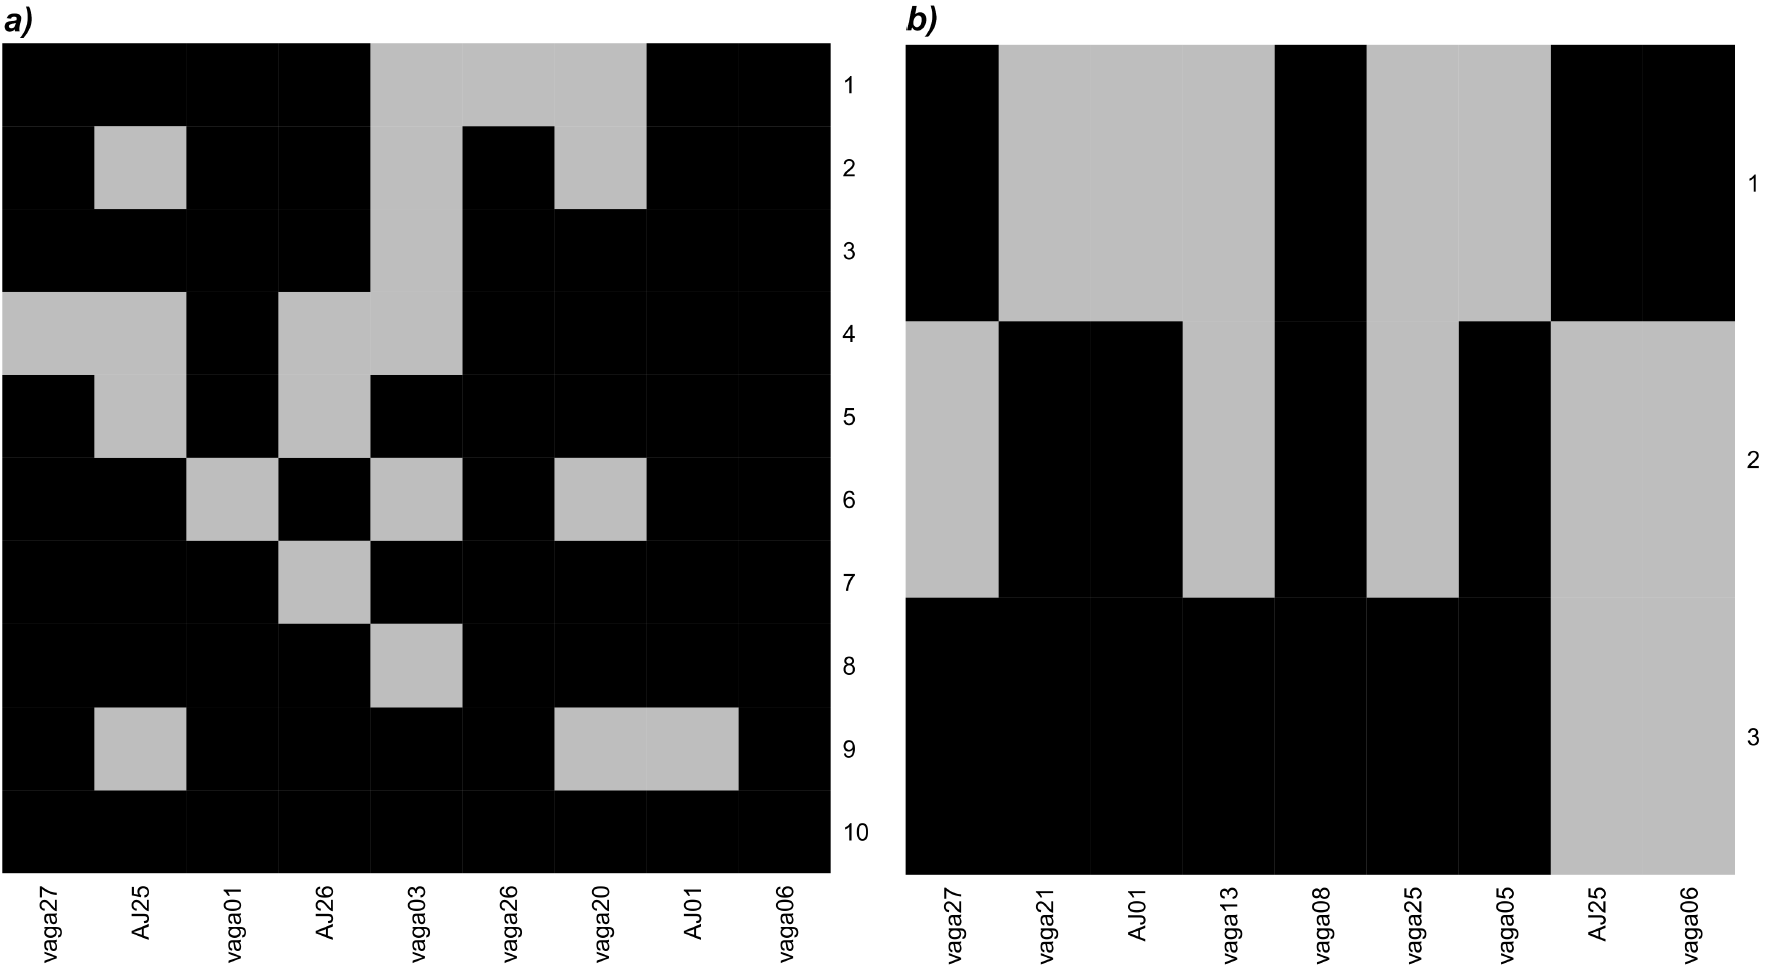


**Figure S2** Heat maps illustrate significant departures from Hardy-Weinberg-Equilibrium (HWE) in (a) *Andrena haemorrhoa* and (b) *Andrena nigroaenea* sample sets, with single loci in columns and spatial clusters in rows; grey indicates loci presumed of not being in HWE with p ≤ 0.05 in the cluster.

**Table S4**: Genetic diversity metrics estimated for each locus, pooled across kettle-holes, for 214 *Andrena haemorrhoa* and 137 *Andrena nigroaenea* individuals. Metrics include observed Heterozygozity (Ho), expected heterozygosity (He), inbreeding coefficient (Fis)

| ***Locus*** | ***Ho*** | ***He*** | ***Fis*** |
| --- | --- | --- | --- |
| *A. haemorrhoa* | | | |
| vaga27 | 0.5954 | 0.6743 | 0.1171 |
| AJ25 | 0.3739 | 0.5260 | 0.2892 |
| vaga01 | 0.8291 | 0.8711 | 0.0481 |
| AJ26 | 0.5880 | 0.6704 | 0.1229 |
| vaga03 | 0.8466 | 0.9484 | 0.1074 |
| vaga26 | 0.6913 | 0.6830 | -0.0121 |
| vaga20 | 0.6484 | 0.8304 | 0.2192 |
| AJ01 | 0.3551 | 0.3899 | 0.0892 |
| vaga06 | 0.8834 | 0.8682 | -0.0175 |
| *A. nigroaenea* | |  |  |
| vaga27 | 0.5551 | 0.5950 | 0.0670 |
| vaga21 | 0.4414 | 0.5711 | 0.2270 |
| AJ01 | 0.4387 | 0.6082 | 0.2788 |
| vaga13 | 0.5812 | 0.6820 | 0.1478 |
| vaga08 | 0.6832 | 0.7655 | 0.1074 |
| vaga25 | 0.5439 | 0.5874 | 0.0740 |
| vaga05 | 0.7620 | 0.8980 | 0.1515 |
| AJ25 | 0.6126 | 0.7755 | 0.2100 |
| vaga06 | 0.6858 | 0.8392 | 0.1828 |


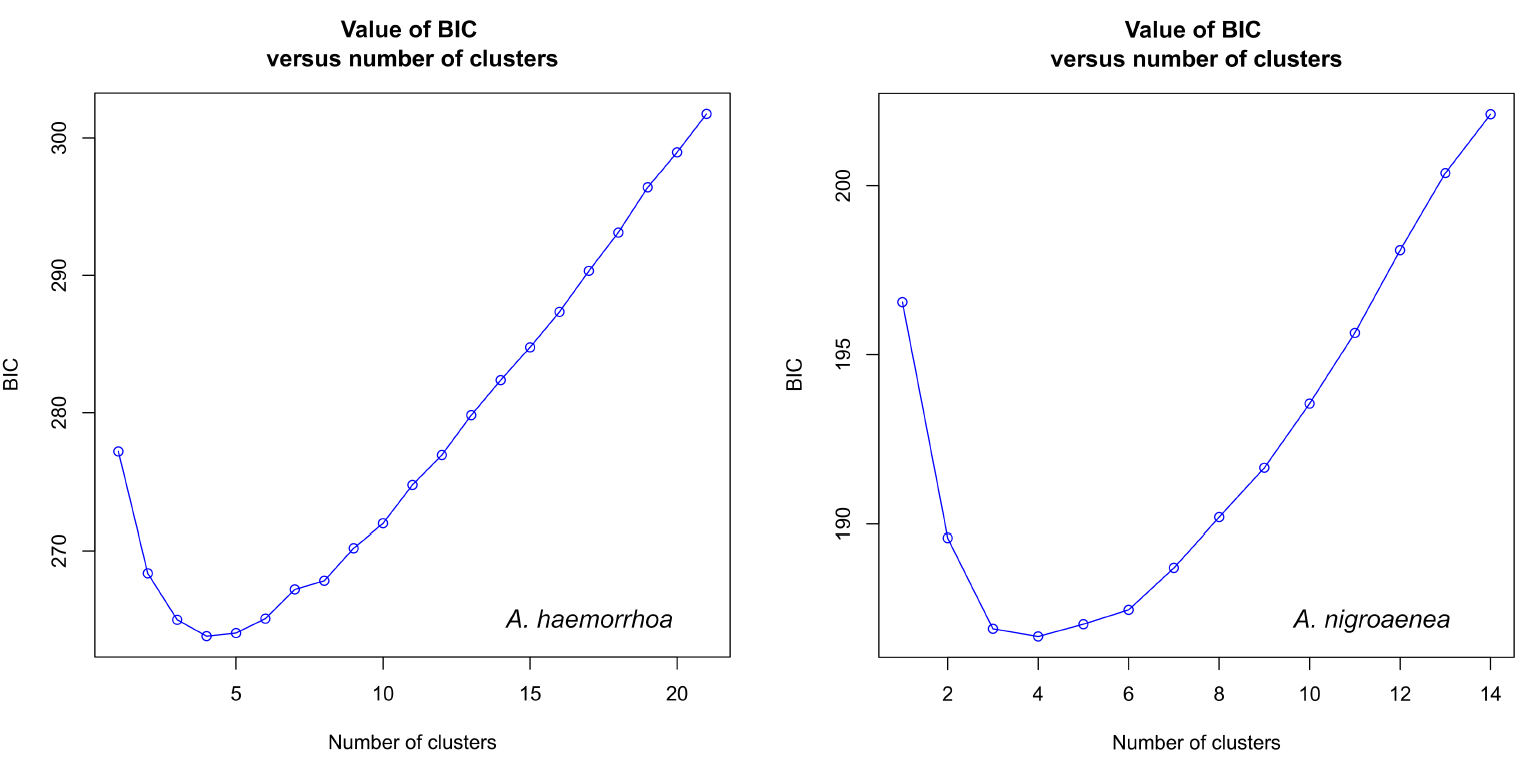


**Figure S3**  Optimal number of clusters (K=4) as determined by ‘k-means’ with Bayesian information criterion (BIC) for Andrena haemorrhoa and Andrena nigroaenea.


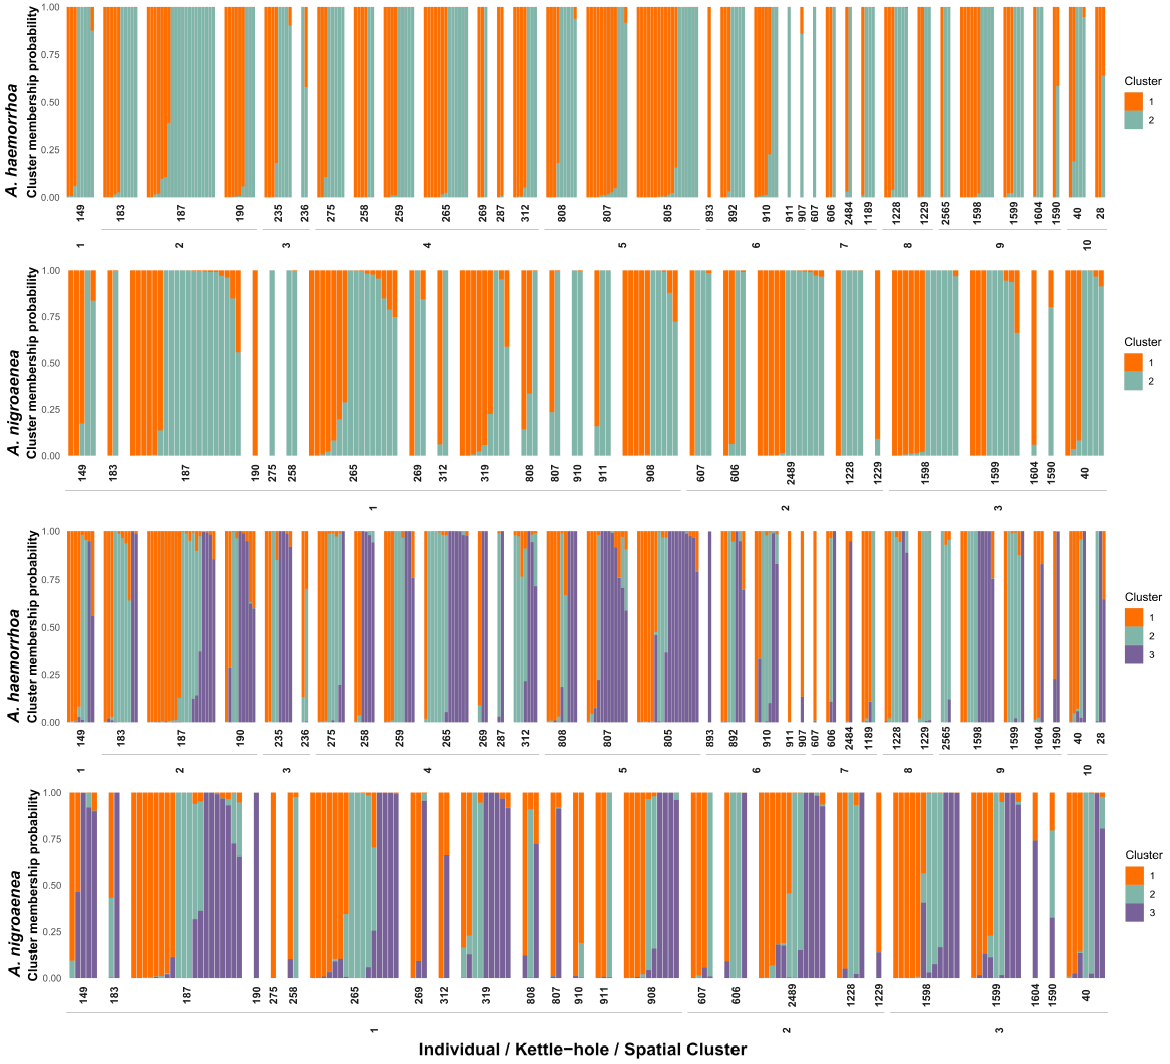


**Figure S4** Results of additional DAPC analyses (upper, K=2 and lower K,=3) for Andrena haemorrhoa and Andrena nigroaenea. Single bars represent cluster membership probability of individual genotypes illustrated by distinct colors, and ordered them by sampling site (local kettle-hole ID by ZALF- Leibniz Centre for Agricultural Landscape Research) and spatial cluster arranged in decreasing longitudinal order.
